# Supplementary material
Source: HighWire-hosted journal article supplement (https://www.cmajopen.ca/highwire/filestream/80885/field_highwire_adjunct_files/0/open-2014-0109-original-submission.pdf)
Supplement: open-2014-0109-original-submission.pdf [file open-2014-0109-original-submission.pdf]

1  
2  
3  
4  
5  
6  
7 **A cross-sectional study of 2014 work locations of Memorial University medical graduates:**  
8 **do we produce ‘townies’ or ‘baymen’?**  
9

10  
11  
12 Maria Mathews<sup>1</sup> PhD; Dana Ryan<sup>1</sup> MA; Asoka Samarasena<sup>2</sup> MD, FRCPC  
13  
14  
15

16 1. Division of Community Health & Humanities, Faculty of Medicine, Memorial University of  
17 Newfoundland, St. John’s NL, Canada  
18

19 2. Assistant Dean Post Graduate Medical Education, Faculty of Medicine, Memorial University  
20 of Newfoundland, St. John’s NL, Canada  
21  
22

23  
24  
25 Corresponding Author: Maria Mathews  
26

27 Rm 2837, Division of Community Health & Humanities  
28

29 Health Sciences Centre, St. John’s NL A1B 3V6  
30

31 Email: [mmathews@mun.ca](mailto:mmathews@mun.ca)  
32

33 Fax: (709) 777-7845  
34

35 Phone: (709) 777-7382  
36  
37  
38  
39  
40

41 Acknowledgements:  
42

43 Not applicable  
44  
45  
46  
47  
48  
49

50 Word Count: 2854  
51

52 Number of figures and tables: 6  
53  
54  
55  
56  
57  
58  
59  
60

## Background

We examined the 2014 work locations of Memorial University of Newfoundland (MUN) medical graduates to identify the predictors of working in 1) Canada, 2) Newfoundland and Labrador (NL), 3) rural Canada, and 4) rural NL.

## Methods

We linked data from graduating class lists, the alumni and post-graduate databases with Scott's Medical database to determine 2014 practice locations for MUN medical graduates (graduating classes from 1973 to 2008).

## Results

In 2014, 1642 (88.1%) MUN graduates were working in Canada, 638 (34.2%) in NL, 217 (11.6%) in rural Canada, and 92 (4.9%) in rural NL. Graduates with rural backgrounds (OR=1.54, 95% CI=1.09-2.17); Newfoundlanders (OR=2.69, 95% CI=2.00-3.61); and who graduated in 1980s (OR=1.58, 95% CI=1.04-2.38), 1990s (OR=2.34, 95% CI=1.51-3.61), and 2000s (OR=1.71, 95% CI=1.12-2.61) were more likely to work in Canada than graduates with urban backgrounds, non-Newfoundlanders, and 1970s graduates, respectively. Physicians with rural backgrounds (OR=1.43, 95% CI=1.13-1.80), Newfoundlanders (OR=9.74, 95% CI=6.48-14.66), 2000s graduates (OR=2.37, 95% CI=1.66-3.38), and who did MUN residency (OR=4.97, 95% CI=3.86-6.39) were more likely to work in NL than physicians from urban backgrounds, non-Newfoundlanders, 1970s graduates and non-MUN residents, respectively. Graduates with rural backgrounds (OR=2.33, 95% CI=1.73-3.13), and family physicians (OR=3.61, 95% CI=2.62-4.96) were more likely to work in rural Canada than graduates from urban backgrounds,

1  
2  
3 and specialists, respectively. Physicians with rural backgrounds (OR=3.35, 95% CI=2.13-5.27),  
4  
5 Newfoundlanders (OR=11.11, 95% CI=2.70-45.75), those who did MUN residency (OR=3.55,  
6  
7 95% CI=1.89-6.66), and family physicians (OR=3.68 95% CI=2.23-6.08) were more likely to  
8  
9 work in rural NL than physicians from urban backgrounds, non-Newfoundlanders, non-MUN  
10  
11 residents, and specialists, respectively.  
12  
13  
14  
15  
16  
17

### 18 **Interpretation**

19  
20 Although MUN graduates comprise a growing proportion of the NL physician workforce, they  
21  
22 form only one-fifth of the rural physician workforce in NL (unchanged since 2004). The study  
23  
24 highlights the downstream work location impacts of the changing characteristics of medical  
25  
26 school graduates in NL.  
27  
28  
29  
30  
31  
32  
33  
34  
35  
36  
37  
38  
39  
40  
41  
42  
43  
44  
45  
46  
47  
48  
49  
50  
51  
52  
53  
54  
55  
56  
57  
58  
59  
60

1  
2  
3 Part of the social accountability mandate of medical schools is to address the local,  
4 regional, and national physician workforce needs [1, 2]. Medical schools, through their  
5 “organization, location and mission play a significant role in rural health care by designing and  
6 facilitating medical training policies and programs that contribute to recruitment and retention  
7 efforts” [3]. Similar to the medical schools in northern Ontario and British Columbia today, the  
8 Memorial University of Newfoundland (MUN) medical school was established in 1967 to meet  
9 the local need for physicians, particularly in rural communities. Previously, we examined the  
10 2004 work location of MUN medical alumni who had graduated between 1973 and 1998. We  
11 found that of the 1322 MUN graduates in our study, 1147 (86.8%) were working in Canada, 406  
12 (30.7%) in NL, 167 (12.6%) in rural Canada and 81 (6.1%) in rural NL [4, 5]. Ten years later, we  
13 replicated the original study to examine the 2014 work locations of MUN graduates (with an  
14 additional 10 years of graduates included in the analysis), with the objective to identify the  
15 proportion and predictors of MUN medical graduates who in 2014, worked in Canada, in NL, in  
16 a rural community in Canada, and in a rural community in NL.  
17  
18  
19  
20  
21  
22  
23  
24  
25  
26  
27  
28  
29  
30  
31  
32  
33  
34  
35

36 Physician resource policy in Canada has undergone substantial transformation in the new  
37 millennium. During the 1990s, in response to recommendations made in the Barer-Stoddart  
38 report, medical schools across Canada reduced their class sizes [6]. However, by 2014, most  
39 medical schools had not only reversed their cuts, but had increased their class sizes, surpassing  
40 the number of seats available in 1991 when Barer and Stoddart made their recommendation. In  
41 addition, new medical schools and satellite campuses of existing schools had been established.  
42  
43  
44  
45  
46  
47  
48  
49  
50  
51  
52  
53  
54  
55  
56  
57  
58  
59  
60

1  
2  
3 made to reverse declining enrolments in family medicine [9, 10]. By 2013, reports of  
4  
5 unemployment among certain specialties emerged [11].  
6  
7

8         Despite these changes, stories of physician shortages and poor retention continue [12, 13,  
9  
10 14, 15, 16, 17]. Local graduates (that is, students from the province, those who graduated from  
11  
12 local medical schools, or those who completed residency training in the province) are seen as a  
13  
14 key contributors to a stable physician workforce since they are more likely to work in smaller  
15  
16 communities, remain longer in those communities, and be familiar with local culture and  
17  
18 practices [2, 5, 18, 19, 20, 21, 22]. This study will update information about the contribution of  
19  
20 the MUN medical school to physician supply in NL and in Canada. Moreover, as graduates from  
21  
22 the first MUN classes start to retire, this study will shed light on how the new generation of  
23  
24 MUN physicians, with their greater emphasis on work-life- balance [23, 24], will change the  
25  
26 distribution of the physician workforce in NL and Canada.  
27  
28  
29  
30  
31  
32  
33

### 34 **Methods**

35  
36         This study was approved by the Newfoundland and Labrador Health Research Ethics  
37  
38 Board. We created a database of all physicians who had graduated from Memorial University  
39  
40 medical school by linking data from graduating class lists, the alumni database, and the  
41  
42 postgraduate database with Scott's Medical Database. To link data, we used first, last, and  
43  
44 maiden names, as well as sex, and graduation year, since this information is common to each  
45  
46 data source. Names were removed from the data set before analysis.  
47  
48  
49

50         Our sample frame included all MUN graduates from the class of 1973 (the first  
51  
52 graduating class) to the class of 2008 (36 years). We selected a cut-off of 2008 to allow sufficient  
53  
54 time for graduates to complete their residency training and enter practice. We excluded  
55  
56  
57  
58  
59  
60

1  
2  
3 physicians who had died or had retired because they are no longer part of the physician  
4  
5 workforce. We also excluded military physicians because they may have limited ability to  
6  
7 choose their practice location. Lastly, we excluded alumni who were sponsored by the Malaysian  
8  
9 government and required to return home after completing their training. These data (military  
10  
11 status, retirement, etc.) were included in the alumni database and in the Scott's Medical  
12  
13 Database. We also reviewed publications from Memorial University (such as alumni magazines)  
14  
15 to identify deceased and retired physicians.  
16  
17  
18  
19

20 In our primary analysis, we examined four outcomes related to physicians' 2014 work  
21  
22 location: a) Work in Canada (yes/no); b) Work in NL (yes/no); c) Work in rural Canada (yes/no),  
23  
24 and d) Work in rural NL (yes/no). Work locations were taken from the 2014 Scott's Medical  
25  
26 Database, supplemented by the alumni database. Both databases are updated when new  
27  
28 information is received. For this study, we used work locations reported in July 2014.  
29  
30  
31

32 We coded communities as urban (10,000 or greater population) or rural (less than 10,000  
33  
34 population) based on their 2001 census population, including bedroom communities as part of  
35  
36 larger urban centres, based on Statistics Canada metropolitan influence (MIZ) scores [25]. We  
37  
38 used the 2001 census population and 10,000 population cut-off for rural communities to be  
39  
40 consistent with our earlier study. Community size was verified using the Statistics Canada 2001  
41  
42 community profiles [26].  
43  
44  
45

46 Other variables considered in the analyses were: sex (male/female), home community  
47  
48 (rural/urban), from NL (yes/no), decade of graduation (70s, 80s, 90s, 2000s), completed some or  
49  
50 all residency training at MUN (yes/no), specialty (family/specialist), and age at graduation (30  
51  
52 years or less/over 30 years). Hometowns, reported at the time of school admission and included  
53  
54 on the graduating class lists, were used to determine whether graduates were from Canada, from  
55  
56  
57  
58  
59  
60

1  
2  
3 NL and from a rural community (hometown population less than 10 000). Specialty was based  
4  
5 on the physician's certified specialization as recorded in the Scott's Medical Database,  
6  
7 supplemented by the alumni database. We coded each physician as either a family physician  
8  
9 (general practitioner or family medicine specialist) or a specialist.  
10  
11

12  
13 Analyses were done using IBM SPSS Statistics software (version 20.0: IBM, Armonk,  
14  
15 NY, U.S.A). After describing the characteristics of the sample using frequencies, we used chi  
16  
17 square tests to identify differences between each outcome and the predictor variables, and  
18  
19 multiple logistic regression analysis to identify significant ( $p < 0.05$ ) predictors for each  
20  
21 outcome. Potential predictors for each regression model were selected on the basis of the bi-  
22  
23 variate analysis and co-linearity between predictor variables was examined *a priori*. In  
24  
25 supplementary analyses, we used chi-square tests to compare physicians by graduation decade.  
26  
27  
28  
29  
30  
31

## 32 Results

33  
34 Of the 2,099 physicians in the sample, we excluded 48 deceased, 10 retired, 19  
35  
36 physicians sponsored by Malaysian government, and 158 physicians whose 2014 location was  
37  
38 unknown, leaving a total of 1864 physicians in the study sample. The majority of physicians in  
39  
40 the study were male (54.1%), came from an urban hometown (71.7%), were from Canada  
41  
42 (95.5%) and NL (74.3%), did at least some part of their postgraduate residency training at MUN  
43  
44 (56.8%), were specialists (56.7%), and under 30 years old when they graduated (84.2%) (Table  
45  
46  
47 1). The mean age at graduation was 26.54 years. The majority (88.1%) were working in Canada  
48  
49 in 2014. Over one-third of the physicians (34.2%) were working in NL, 11.6% in rural  
50  
51 communities in Canada and 4.9% in rural communities in NL.  
52  
53  
54  
55  
56  
57  
58  
59  
60

1  
2  
3  
4  
5  
6  
7  
8  
9  
10  
11  
12  
13  
14  
15  
16  
17  
18  
19  
20  
21  
22  
23  
24  
25  
26  
27  
28  
29  
30  
31  
32  
33  
34  
35  
36  
37  
38  
39  
40  
41  
42  
43  
44  
45  
46  
47  
48  
49  
50  
51  
52  
53  
54  
55  
56  
57  
58  
59  
60

Compared to those working outside Canada, a significantly larger proportion of MUN graduates working in Canada were female, from rural backgrounds, from Canada, from NL, had graduated in the 1990's, and had done at least some of their post-graduate residency training at MUN (Table 2). After controlling for other predictors, rural graduates were 1.54 times more likely than urban graduates to work in Canada in 2014 and physicians from NL were 2.69 times more likely to work in Canada than those from elsewhere (Table 3). Compared to those who graduated in the 1970's, graduates from the 1980's, 1990's and 2000s were 1.58 times, 2.34 times, and 1.71 times more likely, respectively, to work in Canada.

Compared to graduates working outside NL, a larger proportion of graduates working in the province had a rural background, were from Canada, were from NL, graduated in the 2000s, and at least some of their residency training at MUN (Table 2). After controlling for other significant predictors, physicians who had a rural background and were from NL were 1.43 times and 9.74 times more likely to work in NL in 2014 than their urban or non- Newfoundlander counterparts, respectively (Table 4). Those who had graduates in the 2000s were 2.37 times more likely to work in NL than those who had graduated in 1970s. Those who completed some or all of their residency training at MUN were 4.97 times more likely to work in the province in 2014 than those who had not done any residency training at MUN.

As shown in Table 4, compared to MUN graduates who worked in urban communities in Canada, a larger proportion of those who worked in rural communities had a rural background, had graduated in the 1970s or 1990s, had done some or all of their residency training at MUN, and were family physicians/general practitioners. MUN graduates with rural backgrounds and those who were family physicians/general practitioners were 2.33 and 3.61 times more likely to work in rural Canada than those from urban backgrounds and specialists, respectively (Table 3).



1  
2  
3 Compared to MUN graduates who did not work in rural NL, a larger proportion of MUN  
4 graduates who worked in rural NL had a rural background, was from Canada, was from NL,  
5 completed some or all of their residency training at MUN, and were family physicians/general  
6 practitioners (Table 4). After controlling for other predictors, MUN graduates with rural  
7 backgrounds and those from NL were 3.35 and 11.11 times more likely to work in rural NL than  
8 their urban and non-NL counterparts, respectively (Table 3). Physicians who had also done  
9 some or all of their residency training at MUN were 3.55 times more likely to work in rural NL  
10 than those who had not completed any residency training at MUN. Family physicians/general  
11 practitioners were 3.68 times more likely to work in rural NL than specialists (Table 3).  
12  
13  
14  
15  
16  
17  
18  
19  
20  
21  
22  
23

24 In supplementary analysis, we examined the characteristics by decade (Table 5). A larger  
25 proportion of the graduates who had graduated since 2000 was female, and worked in NL than  
26 graduates from the 70s, 80s or 90s. A smaller proportion of 00s graduates was from Canada, did  
27 at least some of their residency training at MUN or became family physicians than graduates  
28 from the 70s, 80s or 90s. A larger proportion of the graduates who had graduated since 2000 had  
29 rural backgrounds than graduates from the 80s or 90s. A smaller proportion of recent (graduated  
30 2000 or later) graduates worked in rural Canada than graduates from the 70s or 90s.  
31  
32  
33  
34  
35  
36  
37  
38  
39  
40  
41  
42

### 43 **Interpretation**

44 We examined 2014 work locations of MUN medical school graduates by linking  
45 administrative program data with Scott's Medical Database. Our study provides data on an  
46 additional ten years of classes and highlights changes in the patterns of work locations of new  
47 physicians. The proportion of MUN alumni that work in each of the four outcomes (in Canada,  
48 in NL, in rural Canada and in rural NL) in 2014 has seen slight changes compared to 2004 [4, 5].  
49  
50  
51  
52  
53  
54  
55  
56  
57  
58  
59  
60

1  
2  
3 While the proportions of alumni working in Canada, in rural communities in Canada, and in rural  
4 communities in NL have fallen, the proportion of graduates working in NL has risen. Further  
5  
6 research is needed to determine whether these two cross-sectional studies are part of a cyclical  
7  
8 rise and fall or indications of more long-term, sustained trends in physician employment patterns.  
9  
10

11  
12 Between 2004 and 2012 (the most recently available data from the Canadian Institute for  
13 Health Information (CIHI)) the number of physicians in NL grew from 992 (192 per 100,000  
14 population) to 1152 (240 per 100,000 population) [27, 28]. MUN graduates comprise a larger  
15  
16 proportion of the provincial workforce; roughly 40.9% in 2004 to approximately 55.4% today  
17  
18 (the latter figure uses 2014 numerator from this study and 2012 denominator from CIHI). These  
19  
20 figures bode well for long-term retention given that MUN trained physicians have longer  
21  
22 retention times in NL than either other Canadian or international medical graduates [5, 22, 29].  
23  
24  
25  
26  
27  
28

29  
30 MUN graduates contribute unequally to the make-up of specialists and family physicians  
31  
32 workforce over the ten year period. According to CIHI, between 2004 and 2012 the number of  
33  
34 specialists in NL grew by 22.1% from 479 to 585, and the number of family physicians grew by  
35  
36 26.3% from 513 to 648 [27, 28]. In 2014, MUN graduates comprised an estimated 57.6% of the  
37  
38 province's specialists (337 of 585) and 46.5% of the family physicians (301 of 648), compared to  
39  
40 42.2% (202 of 479 specialists) and 39.8% (204 of 513 family physicians) in 2004[4],  
41  
42  
43 respectively. Since 2004, MUN produced a net addition of 135 specialists and 97 family  
44  
45 physicians to the provincial workforce.  
46  
47

48  
49 Most (88.4%) MUN graduates work in urban centres. This figure is consistent with other  
50  
51 studies [30, 31]; 16% of graduates from Canadian medical schools practice in rural communities  
52  
53 [30].  
54  
55  
56  
57  
58  
59  
60

1  
2  
3 The majority (546 of 638, 85.6%) of MUN graduates who worked in NL worked in urban  
4 communities in the province, which is not surprising given with the number of specialists alumni  
5 working in the province. Rural communities (defined in this study as having less than 10,000  
6 population), with their smaller population and infrastructure are unlikely to support a number of  
7 specialties and sub-specialties. In 2014, there were 92 physicians working in rural NL, a net gain  
8 of 11 physicians since 2004 [5]. In 2004, MUN medical graduates made up roughly 20.8% of the  
9 rural physician workforce in NL [5]; in 2014, they made up 20.9% (based on data from the  
10 College of Physicians and Surgeons of Newfoundland and Labrador physician listing [32]).  
11 While MUN graduates make up the majority of physicians in the province as a whole, NL's rural  
12 physicians continue to be largely international and other Canadian medical graduates.  
13  
14  
15  
16  
17  
18  
19  
20  
21  
22  
23  
24  
25  
26

27 By replicating our earlier study methods (and using 2001 populations to define rural  
28 communities), we are able to compare directly two cohorts of newly graduated physicians  
29 (graduates from the 1990s in 2004 and graduates from the 2000s in 2014) in their first years of  
30 practice. These cohorts have substantially different work location patterns (Table 6). While the  
31 proportion of new graduates working in Canada has fallen, the proportion of graduates working  
32 in NL has risen. Moreover, more new graduates working in Canada were working in NL. In  
33 2004, 152 (34.5%) of the 440 “new” graduates in Canada were working in NL[4]; in 2014 that  
34 figure grew to 47.3% (215 of the 454 new graduates working in Canada).  
35  
36  
37  
38  
39  
40  
41  
42  
43  
44  
45

46 A smaller proportion of new graduates in 2014 than 2004 were working in rural practice  
47 in Canada or in Newfoundland (Table 6). In 2004, roughly one quarter (24.3%) of new graduates  
48 in NL worked in rural communities (37 of 152) [5]; among new graduates in 2014, that figure  
49 dropped to 9.8% (21 of 215). The decrease in rural practice among new graduates is troubling  
50 given that physicians are more likely to work in rural communities early in their career, with  
51  
52  
53  
54  
55  
56  
57  
58  
59  
60

1  
2  
3 many subsequently moving to urban communities [19, 33, 34]. Few urban physicians “convert”  
4  
5 to rural practice as their careers progress.  
6  
7

8           What accounts for these shifts in work patterns? Considering the profile of MUN  
9  
10 graduates over the decades in relations to the predictors of practice location highlights how  
11  
12 changes in the characteristics of medical trainees impact the local physician workforce. While a  
13  
14 larger proportion of more recent graduates (classes of 2000-2008) than have rural backgrounds, a  
15  
16 smaller proportion are opting for family medicine or completing residency training at MUN  
17  
18 (Table 5). After excluding seats reserved for international medical students, in 2013, less than  
19  
20 half of all residency positions at MUN were filled by MUN graduates; in family medicine 35  
21  
22 (52.2%) of the 67 PG1 and PG2 seats were filled by MUN graduates [35].  
23  
24  
25  
26

27           The study relied on administrative program data which do not capture the full range of  
28  
29 factors that affect work location decisions. The study is cross-sectional and provides work  
30  
31 location data at one point in time and does not estimate the length of time a physician has worked  
32  
33 in a given location. It also includes physicians at different stages of their careers. While we are  
34  
35 able to compare the results with a previous study of identical design, we can only directly  
36  
37 compare the work pattern of new graduates. The study also looks at one medical school and one  
38  
39 province. Results may not apply to other jurisdictions.  
40  
41  
42  
43  
44  
45

## 46 **Conclusions**

47  
48           Over one-third of the MUN medical graduates work in the NL and represent roughly  
49  
50 55.4% of the provincial physician workforce. The majority of MUN medical graduates are  
51  
52 specialists working in urban areas in the province. Although MUN medical graduates comprise a  
53  
54 growing proportion of the physician workforce in NL, they form one-fifth of the province’s rural  
55  
56  
57  
58  
59  
60

1  
2  
3 physician workforce, a figure that remains unchanged since 2004. Rural practice among recent  
4  
5 MUN alumni, whether in a community in NL or anywhere in Canada, has fallen to almost half  
6  
7  
8 the rates of new graduates from a decade ago. The study highlights the downstream impact of the  
9  
10 changes in the characteristics of physicians graduating from medical school in NL, who  
11  
12 increasingly opt for specialist practice and residency training outside the province.  
13  
14  
15  
16  
17  
18  
19  
20  
21  
22  
23  
24  
25  
26  
27  
28  
29  
30  
31  
32  
33  
34  
35  
36  
37  
38  
39  
40  
41  
42  
43  
44  
45  
46  
47  
48  
49  
50  
51  
52  
53  
54  
55  
56  
57  
58  
59  
60

Confidential

## References

1. Stoddart G, Barer ML. Toward integrated medical resource policies for Canada: 5. The roles and funding of academic medical centres. *CMAJ*. 1992;146(11): 1919-24.
2. Strasser R, Neusy AJ. Context counts: training health workers in and for rural and remote areas. *Bull World Health Organ*. 2010;88:777-82.
3. Curran V, Rourke J. The role of medical education in the recruitment and retention of rural physicians. *Med Teach*. 2004; 26(3):265-72.
4. Mathews M, Rourke JTB, Park AD. National and provincial retention of medical graduates of Memorial University. *CMAJ*. 2006;175(4):357-60.
5. Mathews M, Park AD, Rourke JTB. The contribution of Memorial University's medical school to rural physician supply. *CJRM*. 2008;13(1):15-21.
6. Stoddart GL, Barer ML. Will increasing medical school enrolment solve Canada's physician supply problems? *CMAJ*. 1999;161(8):983-4.
7. Dauphinee WD. Integrating international medical graduates into health care delivery in Canada: attempting to resolve years of discontinuity between immigration policy and

1  
2  
3 implementation strategies in the field. Paper presented at: 7<sup>th</sup> International Medical Workforce  
4 Collaborative, 2003; Oxford, England.  
5  
6  
7  
8

9  
10 8. Canadian Collaborative Centre for Physician Resources. International Medical Graduates in  
11 Canada. Canadian Medical Association. 2008  
12  
13  
14

15  
16  
17 9. Thurber AD, Busing N. Decreasing supply of family physicians and general practitioners.  
18 Serious implications for the future. Can Fam Physician. 1999;45:2084-9.  
19  
20  
21

22  
23  
24 10. Family Medicine Expansion report [Internet]. Ontario: Council of Ontario Universities and  
25 Government of Ontario; 2013 [cited 2014 Sept 16]. Available from:  
26  
27

28  
29 <http://www.cou.on.ca/publications/reports/pdfs/family-medicine-expansion-report-2013---final>  
30  
31  
32

33  
34 11. Fréchette D, Hollenberg D, Shrichland A, Jacob C, Datta I. What's really behind Canada's  
35 unemployed specialists? Too many, too few doctors? Findings from the Royal College's  
36 employment study. Ottawa, ON: The Royal College of Physicians and Surgeons of Canada.  
37  
38  
39 2013.  
40  
41  
42  
43

44  
45  
46 12. CBC News. Doctor shortage on Burin Peninsula worrisome for patients [Internet]. 2014 Sept  
47 8 [updated 2014 Sept 8; cited 2014 Sept 16]. Available from:  
48  
49

50  
51 [http://www.cbc.ca/news/canada/newfoundland-labrador/doctor-shortage-on-burin-peninsula-](http://www.cbc.ca/news/canada/newfoundland-labrador/doctor-shortage-on-burin-peninsula-worrisome-for-patients-1.2758070)  
52  
53 [worrisome-for-patients-1.2758070](http://www.cbc.ca/news/canada/newfoundland-labrador/doctor-shortage-on-burin-peninsula-worrisome-for-patients-1.2758070)  
54  
55  
56  
57  
58  
59  
60

1  
2  
3 13. CBC News. Doctor shortage alleviated in Grand Falls-Windsor [Internet]. 2013 Aug 28

4  
5 [updated 2013 Aug 28; cited 2014 Sept 16]. Available from:

6  
7  
8 [http://www.cbc.ca/news/canada/newfoundland-labrador/doctor-shortage-alleviated-in-grand-](http://www.cbc.ca/news/canada/newfoundland-labrador/doctor-shortage-alleviated-in-grand-falls-windsor-1.1379335)  
9  
10 [falls-windsor-1.1379335](http://www.cbc.ca/news/canada/newfoundland-labrador/doctor-shortage-alleviated-in-grand-falls-windsor-1.1379335)

11  
12  
13  
14  
15 14. CBC News. Unhealthy number of medical specialists in the north: NOSM [Internet]. 2014

16  
17 Aug 11 [updated 2014 Aug 13; cited 2014 Sept 16]. Available from:

18  
19  
20 [http://www.cbc.ca/news/canada/sudbury/unhealthy-number-of-medical-specialists-in-the-north-](http://www.cbc.ca/news/canada/sudbury/unhealthy-number-of-medical-specialists-in-the-north-nosm-1.2732950)  
21  
22 [nosm-1.2732950](http://www.cbc.ca/news/canada/sudbury/unhealthy-number-of-medical-specialists-in-the-north-nosm-1.2732950)

23  
24  
25  
26  
27 15. CBC News. Western Hospital staff shortage worries community [Internet]. 2013 Jan 8

28  
29 [updated 2013 Jan 8; cited 2014 Sept 16]. Available from:

30  
31  
32 [http://www.cbc.ca/news/canada/prince-edward-island/western-hospital-staff-shortage-worries-](http://www.cbc.ca/news/canada/prince-edward-island/western-hospital-staff-shortage-worries-community-1.1358248)  
33  
34 [community-1.1358248](http://www.cbc.ca/news/canada/prince-edward-island/western-hospital-staff-shortage-worries-community-1.1358248)

35  
36  
37  
38  
39 16. CBC News. Windsor-Essex still short on doctors, specialists [Internet]. 2013 Mar 13

40  
41 [updated 2013 Mar 14; cited 2014 Sept 16]. Available from:

42  
43  
44 [http://www.cbc.ca/news/canada/windsor/windsor-essex-still-short-on-doctors-specialists-](http://www.cbc.ca/news/canada/windsor/windsor-essex-still-short-on-doctors-specialists-1.1361822)  
45  
46 [1.1361822](http://www.cbc.ca/news/canada/windsor/windsor-essex-still-short-on-doctors-specialists-1.1361822)

47  
48  
49  
50  
51 17. CBC News. Thunder Bay doctor shortage in critical condition [Internet]. 2012 Jan 19

52  
53 [updated 2012 Jan 19; cited 2014 Sept 16]. Available from:



1  
2  
3 [http://www.cbc.ca/news/canada/thunder-bay/thunder-bay-doctor-shortage-in-critical-condition-](http://www.cbc.ca/news/canada/thunder-bay/thunder-bay-doctor-shortage-in-critical-condition-1.1270867)  
4  
5 [1.1270867](http://www.cbc.ca/news/canada/thunder-bay/thunder-bay-doctor-shortage-in-critical-condition-1.1270867)  
6  
7  
8  
9

10 18. Bustinza R, Gagnon S, Burigusa G. Le Programme d'enseignement decentralise et la  
11 retention des medecins omnipraticiens dans ka region di Bas-Saint-Laurent au Québec. Can  
12 Fam Physician. 2009;55:e29-34. French.  
13  
14  
15

16  
17  
18  
19 19. Matsumoto M, Inoue K, Kajii E. Policy implications of a financial incentive programme to  
20 retain a physician workforce in underserved Japanese rural areas. Soc Sci Med. 2010;71:667-71.  
21  
22  
23

24  
25  
26  
27 20. Dunbabin JS, McEwin K, Cameron I. Postgraduate medical placements in rural areas: their  
28 impact on the rural medical workforce. Rural Remote Health. 2006; 6(481): 1-10.  
29  
30  
31

32  
33  
34 21. Wilson NW, Couper ID, De Vries E, Reid S, Fish T, Marais BJ. A critical review of  
35 interventions to redress the inequitable distribution of healthcare professionals to rural and  
36 remote areas. Rural Remote Health. 2009; 9(1060):1-21.  
37  
38  
39

40  
41  
42  
43 22. Fleming P, Mathews M. Retention of specialist physicians in Newfoundland and Labrador.  
44 OM. 2012; 6(1):e1-9.  
45  
46  
47

48  
49  
50 23. Mathews M, Seguin M, Chowdhury N, Card R. Generational differences in factors  
51 influencing physicians to choose a work location. Rural Remote Health [Internet]. 2012 [cited  
52  
53  
54  
55  
56  
57  
58  
59  
60

1  
2  
3 2014 Sept 16];12:1864. Available from:

4  
5 <http://www.rrh.org.au/articles/subviewnew.asp?ArticleID=1864>  
6  
7

8  
9  
10 24. Bickel J, Brown AJ. Generation X: implications for faculty recruitment and development in  
11  
12 academic health centres. Acad Med. 2005;80(3):205-10.  
13  
14

15  
16  
17 25. Statistics Canada. Census metropolitan influenced zone (MIZ) [Internet]. 2011 [updated 2012  
18  
19 Dec 4; cited 2014 Sept 16]. Available from: <http://www12.statcan.gc.ca/census->  
20  
21 [recensement/2011/ref/dict/geo010-eng.cfm](http://www12.statcan.gc.ca/census-recensement/2011/ref/dict/geo010-eng.cfm).  
22  
23

24  
25 26. Statistics Canada. 2001 Community Profiles [Internet]. 2001 [updated 2012 Feb 17; cited  
26  
27 2014 Sept 16]. Available from:  
28  
29 <http://www12.statcan.ca/english/profil01/CP01/Index.cfm?Lang=E>.  
30  
31

32  
33 27. Canadian Institute for Health Information. Supply, Distribution and Migration of Canadian  
34  
35 Physicians, 2012. Ottawa, ON: CIHI 2013  
36  
37

38  
39 28. Canadian Institute for Health Information. Supply, Distribution and Migration of Canadian  
40  
41 Physicians, 2008. Ottawa, ON: CIHI 2009  
42  
43

44  
45 29. Audas R, Ryan A, Vardy D. Where did the doctors go? A study of retention and migration of  
46  
47 provisionally licensed international medical graduates practising in Newfoundland and Labrador  
48  
49 between 1995 and 2006. CJRM. 2009;14(1):21-4.  
50  
51  
52  
53  
54  
55  
56  
57  
58  
59  
60

- 1  
2  
3 30. Buske L. First practice: family physicians initially locating in rural areas. CJRM.  
4  
5 2013;18(3):80-5.  
6  
7  
8  
9  
10 31. Lu J, Hakes J, Bai M, Tolhurst H, Dickinson JA. Rural intentions - factors affecting the  
11  
12 career choices of family medicine graduates. Can Fam Physician 2008; 54: 1016-7.  
13  
14  
15  
16  
17 32. College of Physicians and Surgeons of Newfoundland and Labrador. Physician Search. Cited  
18  
19 2014 July 31 2014. Available from: <http://www.cpsnl.ca/default.asp?com=DoctorSearch&adv=1>.  
20  
21  
22  
23  
24 33. Mathews M, Heath SL, Neufeld SM, Samarasena A. Evaluation of physician return-for-  
25  
26 service agreements in Newfoundland and Labrador. Healthcare Policy. 2013; 8(3):42-56.  
27  
28  
29  
30  
31 34. Royston PJ, Mathieson K, Leafman J, Ojan-Sheehan O. Medical student characteristics  
32  
33 predictive of intent for rural practice. Rural and Remote Health. 2012; 12(2107):1-10.  
34  
35  
36  
37  
38 35. Canadian Post MD Education Registry. 2013-2014 Newfoundland Provincial Report  
39  
40 [Internet]. Ottawa: Association of Faculties of Medicine; 2014 [cited 2014 Sept 16]. Available  
41  
42 from: [http://www.caper.ca/~assets/pdf\\_2013ProvReport\\_NF.pdf](http://www.caper.ca/~assets/pdf_2013ProvReport_NF.pdf)  
43  
44  
45  
46  
47  
48  
49  
50  
51  
52  
53  
54  
55  
56  
57  
58  
59  
60

Table 1. Characteristics of study sample (1973-2008 MUN graduates).

| Characteristics                                                                                                                                                                | MUN Medical Graduates<br>(1973-2008; n=1864)<br>n (%) |
|--------------------------------------------------------------------------------------------------------------------------------------------------------------------------------|-------------------------------------------------------|
| <b>Sex</b>                                                                                                                                                                     |                                                       |
| Male                                                                                                                                                                           | 1008 (54.1)                                           |
| Female                                                                                                                                                                         | 856 (45.9)                                            |
| <b>Rural Background</b>                                                                                                                                                        |                                                       |
| Urban                                                                                                                                                                          | 1318 (71.7)                                           |
| Rural                                                                                                                                                                          | 520 (27.9)                                            |
| <b>From Canada</b>                                                                                                                                                             |                                                       |
| No (International)                                                                                                                                                             | 83 (4.5)                                              |
| Yes                                                                                                                                                                            | 1766 (95.5)                                           |
| <b>From NL</b>                                                                                                                                                                 |                                                       |
| No                                                                                                                                                                             | 475 (25.7)                                            |
| Yes                                                                                                                                                                            | 1374 (74.3)                                           |
| <b>Graduation Year</b>                                                                                                                                                         |                                                       |
| 1973-1979                                                                                                                                                                      | 291 (15.6)                                            |
| 190-1989                                                                                                                                                                       | 514 (27.6)                                            |
| 1990-1999                                                                                                                                                                      | 546 (29.3)                                            |
| 2000-2008                                                                                                                                                                      | 513 (27.5)                                            |
| <b>Did MUN Residency</b>                                                                                                                                                       |                                                       |
| No                                                                                                                                                                             | 795 (43.2)                                            |
| Yes                                                                                                                                                                            | 1047 (56.8)                                           |
| <b>Specialty</b>                                                                                                                                                               |                                                       |
| Specialist                                                                                                                                                                     | 1057 (56.7)                                           |
| GP/FP                                                                                                                                                                          | 806 (43.3)                                            |
| <b>Age at Graduation</b>                                                                                                                                                       |                                                       |
| Young (< 30)                                                                                                                                                                   | 1561 (84.2)                                           |
| Old (≥ 30)                                                                                                                                                                     | 292 (15.7)                                            |
| <b>Workplace in Canada</b>                                                                                                                                                     |                                                       |
| No                                                                                                                                                                             | 222 (11.9)                                            |
| Yes                                                                                                                                                                            | 1642 (88.1)                                           |
| <b>Workplace in NL</b>                                                                                                                                                         |                                                       |
| No                                                                                                                                                                             | 1226 (65.8)                                           |
| Yes                                                                                                                                                                            | 638 (34.2)                                            |
| <b>Workplace in Rural Canada</b>                                                                                                                                               |                                                       |
| No                                                                                                                                                                             | 1647 (88.4)                                           |
| Yes                                                                                                                                                                            | 217 (11.6)                                            |
| <b>Workplace in Rural NL</b>                                                                                                                                                   |                                                       |
| No                                                                                                                                                                             | 1772 (95.1)                                           |
| Yes                                                                                                                                                                            | 92 (4.9)                                              |
| *numbers may not add up to 1864 due to missing numbers; MUN= Memorial University or Newfoundland; NL= Newfoundland and Labrador; GP/FP= general practitioners/family physician |                                                       |

Table 2. Characteristics of MUN medical graduates who work in and outside Canada, and in and outside NL

| Variable                 | Work in Canada in 2014 |              | P value | Work in NL in 2014 |              | P value |
|--------------------------|------------------------|--------------|---------|--------------------|--------------|---------|
|                          | No<br>n (%)            | Yes<br>n (%) |         | No<br>n (%)        | Yes<br>n (%) |         |
| <b>Sex</b>               |                        |              | 0.010   |                    |              | 0.202   |
| Male                     | 138 (62.2)             | 870 (53.0)   |         | 676 (55.1)         | 332 (52.0)   |         |
| Female                   | 84 (37.8)              | 772 (47.0)   |         | 550 (44.9)         | 306 (48.0)   |         |
| <b>Rural Background</b>  |                        |              | 0.002   |                    |              | 0.000   |
| Urban                    | 173 (78.6)             | 1106 (68.3)  |         | 890 (73.9)         | 389 (61.4)   |         |
| Rural                    | 47 (21.4)              | 513 (31.7)   |         | 315 (26.1)         | 245 (38.6)   |         |
| <b>From Canada</b>       |                        |              | 0.000   |                    |              | 0.000   |
| No (International)       | 56 (25.3)              | 27 (1.7)     |         | 79 (6.5)           | 4 (0.6)      |         |
| Yes                      | 165 (74.7)             | 1601 (98.3)  |         | 1137 (93.5)        | 629 (99.4)   |         |
| <b>From NL</b>           |                        |              | 0.000   |                    |              | 0.000   |
| No                       | 98 (44.3)              | 377 (23.2)   |         | 447 (36.8)         | 28 (4.4)     |         |
| Yes                      | 123 (55.7)             | 1251 (76.8)  |         | 768 (63.2)         | 606 (95.6)   |         |
| <b>Graduation Year</b>   |                        |              | 0.006   |                    |              | 0.000   |
| 1973-1979                | 50 (22.5)              | 241 (14.7)   |         | 196 (16.0)         | 95 (14.9)    |         |
| 190-1989                 | 64 (28.8)              | 450 (27.4)   |         | 361 (29.4)         | 153 (24.0)   |         |
| 1990-1999                | 49 (22.1)              | 497 (30.3)   |         | 371 (30.3)         | 175 (27.4)   |         |
| 2000-2008                | 59 (26.6)              | 454 (27.6)   |         | 298 (24.3)         | 215 (33.7)   |         |
| <b>Did MUN Residency</b> |                        |              | 0.000   |                    |              | 0.000   |
| No                       | 120 (54.3)             | 675 (41.6)   |         | 671 (55.5)         | 124 (19.6)   |         |
| Yes                      | 101 (45.7)             | 946 (58.4)   |         | 539 (44.5)         | 508 (80.4)   |         |
| <b>Specialty</b>         |                        |              | 0.466   |                    |              | 0.014   |
| Specialist               | 131 (59.0)             | 926 (56.4)   |         | 720 (58.8)         | 337 (52.8)   |         |
| GP/FP                    | 91 (41.0)              | 715 (43.6)   |         | 505 (41.2)         | 301 (47.2)   |         |
| <b>Age at Graduation</b> |                        |              | 0.412   |                    |              | 0.937   |
| Young (< 30)             | 182 (82.4)             | 1379 (84.5)  |         | 1028 (84.2)        | 533 (84.3)   |         |
| Old (≥ 30)               | 39 (17.6)              | 253 (15.5)   |         | 193 (15.8)         | 99 (15.7)    |         |

MUN= Memorial University or Newfoundland; NL= Newfoundland and Labrador; GP/FP= general practitioners/family physician

1  
2  
3  
4  
5  
6  
7  
8  
9  
10  
11  
12  
13  
14  
15  
16  
17  
18  
19  
20  
21  
22  
23  
24  
25  
26  
27  
28  
29  
30  
31  
32  
33  
34  
35  
36  
37  
38  
39  
40  
41  
42  
43  
44  
45  
46  
47  
48  
49

Table 3. Predictors of MUN medical graduates who work in Canada, in NL, in rural Canada, and in rural NL

| Variable                                                                                                                                                              | In Canada<br>OR (95% CI) | In NL<br>OR (95% CI) | In rural Canada<br>OR (95% CI) | In rural NL<br>OR (95% CI) |
|-----------------------------------------------------------------------------------------------------------------------------------------------------------------------|--------------------------|----------------------|--------------------------------|----------------------------|
| <b>Rural Background</b>                                                                                                                                               |                          |                      |                                |                            |
| Urban                                                                                                                                                                 | 1.00                     | 1.00                 | 1.00                           | 1.00                       |
| Rural                                                                                                                                                                 | 1.54 (1.09-2.17)         | 1.43 (1.13-1.80)     | 2.33 (1.73-3.13)               | 3.35 (2.13-5.27)           |
| <b>From NL</b>                                                                                                                                                        |                          |                      |                                |                            |
| No                                                                                                                                                                    | 1.00                     | 1.00                 | -                              | 1.00                       |
| Yes                                                                                                                                                                   | 2.69 (2.00-3.61)         | 9.74 (6.48-14.66)    | -                              | 11.11 (2.70-45.75)         |
| <b>Graduation Year</b>                                                                                                                                                |                          |                      |                                |                            |
| 1973-1979                                                                                                                                                             | 1.00                     | 1.00                 | -                              | -                          |
| 1980-1989                                                                                                                                                             | 1.58 (1.05-2.38)         | -                    | -                              | -                          |
| 1990-1999                                                                                                                                                             | 2.34 (1.51-3.61)         | -                    | -                              | -                          |
| 2000-2008                                                                                                                                                             | 1.71 (1.12-2.61)         | 2.37 (1.66-3.38)     | -                              | -                          |
| <b>Did MUN Residency</b>                                                                                                                                              |                          |                      |                                |                            |
| No                                                                                                                                                                    | -                        | 1.00                 | -                              | 1.00                       |
| Yes                                                                                                                                                                   | -                        | 4.97 (3.86-6.39)     | -                              | 3.55 (1.89-6.66)           |
| <b>Specialty</b>                                                                                                                                                      |                          |                      |                                |                            |
| Specialist                                                                                                                                                            | -                        | -                    | 1.00                           | 1.00                       |
| GP/FP                                                                                                                                                                 | -                        | -                    | 3.61 (2.62-4.96)               | 3.68 (2.23-6.08)           |
| OR=odds ratio; 95% CI= 95% confidence interval; MUN=Memorial University of Newfoundland; NL= Newfoundland and Labrador; GP/FP= general practitioners/family physician |                          |                      |                                |                            |

Table 4. Characteristics of MUN medical graduates who work in and outside rural Canada, and in and outside rural NL

| Variable                 | Work in rural Canada in 2014 |              | P value | Work in rural NL in 2014 |              | P value |
|--------------------------|------------------------------|--------------|---------|--------------------------|--------------|---------|
|                          | No<br>n (%)                  | Yes<br>n (%) |         | No<br>n (%)              | Yes<br>n (%) |         |
| <b>Sex</b>               |                              |              | 0.091   |                          |              | 0.260   |
| Male                     | 879 (53.4)                   | 129 (59.4)   |         | 953 (53.8)               | 55 (59.8)    |         |
| Female                   | 768 (46.6)                   | 88 (40.6)    |         | 819 (46.2)               | 37 (40.2)    |         |
| <b>Rural Background</b>  |                              |              | 0.000   |                          |              | 0.000   |
| Urban                    | 1174 (72.2)                  | 105 (49.5)   |         | 1246 (71.3)              | 33 (35.9)    |         |
| Rural                    | 453 (27.8)                   | 107 (50.5)   |         | 501 (28.7)               | 59 (64.1)    |         |
| <b>From Canada</b>       |                              |              | 0.049   |                          |              | 0.033   |
| No (International)       | 79 (4.8)                     | 4 (1.9)      |         | 83 (4.7)                 | 0 (0)        |         |
| Yes                      | 1556 (95.2)                  | 210 (98.1)   |         | 1674 (95.3)              | 92 (100.0)   |         |
| <b>From NL</b>           |                              |              | 0.320   |                          |              | 0.000   |
| No                       | 426 (26.1)                   | 49 (22.9)    |         | 473 (26.9)               | 2 (2.2)      |         |
| Yes                      | 1209 (73.9)                  | 165 (77.1)   |         | 1284 (73.1)              | 90 (97.8)    |         |
| <b>Graduation Year</b>   |                              |              | 0.021   |                          |              | 0.079   |
| 1973-1979                | 253 (15.4)                   | 38 (17.5)    |         | 271 (15.3)               | 20 (21.7)    |         |
| 190-1989                 | 458 (27.8)                   | 56 (25.8)    |         | 496 (28.0)               | 18 (19.6)    |         |
| 1990-1999                | 467 (28.4)                   | 79 (36.4)    |         | 513 (29.0)               | 33 (35.9)    |         |
| 2000-2008                | 469 (28.5)                   | 44 (20.3)    |         | 492 (27.8)               | 21 (22.8)    |         |
| <b>Did MUN Residency</b> |                              |              | 0.003   |                          |              | 0.000   |
| No                       | 723 (44.4)                   | 72 (33.6)    |         | 783 (44.7)               | 12 (13.0)    |         |
| Yes                      | 905 (55.6)                   | 142 (66.4)   |         | 967 (55.3)               | 80 (87.0)    |         |
| <b>Specialty</b>         |                              |              | 0.000   |                          |              | 0.000   |
| Specialist               | 994 (60.4)                   | 63 (29.0)    |         | 1035 (58.4)              | 22 (23.9)    |         |
| GP/FP                    | 652 (39.6)                   | 154 (71.0)   |         | 736 (41.6)               | 70 (76.1)    |         |
| <b>Age at Graduation</b> |                              |              | 0.556   |                          |              | 0.883   |
| Young (< 30)             | 1382 (84.4)                  | 179 (82.9)   |         | 1484 (84.3)              | 77 (83.7)    |         |
| Old (≥ 30)               | 255 (15.6)                   | 37 (17.1)    |         | 277 (15.7)               | 15 (16.3)    |         |

MUN= Memorial University or Newfoundland; NL= Newfoundland and Labrador; GP/FP= general practitioners/family physician

Table 5. Characteristics of Memorial University Medical Graduates by Decade of Graduation

| Variable                         | 70s<br>n (%) | 80s<br>n (%) | 90s<br>n (%) | 00s<br>n (%) | P value                       |
|----------------------------------|--------------|--------------|--------------|--------------|-------------------------------|
| <b>Sex</b>                       |              |              |              |              | <0.000 <sup>a,b,c,d,e,f</sup> |
| Male                             | 206 (70.8)   | 307 (59.7)   | 276 (50.5)   | 219 (42.7)   |                               |
| Female                           | 85 (29.2)    | 207 (40.3)   | 270 (49.5)   | 294 (57.3)   |                               |
| <b>Rural Background</b>          |              |              |              |              | 0.002 <sup>d,e,f</sup>        |
| Urban                            | 197 (69.9)   | 382 (75.0)   | 379 (69.5)   | 321 (63.8)   |                               |
| Rural                            | 85 (30.1)    | 127 (25.0)   | 166 (30.5)   | 182 (36.2)   |                               |
| <b>From Canada</b>               |              |              |              |              | <0.000 <sup>a,b,c,e,f</sup>   |
| No (International)               | 15 (5.2)     | 7 (1.4)      | 4 (0.7)      | 57 (11.3)    |                               |
| Yes                              | 272 (94.8)   | 507 (98.6)   | 540 (99.3)   | 447 (88.7)   |                               |
| <b>From NL</b>                   |              |              |              |              | 0.632                         |
| No                               | 65 (22.6)    | 133 (25.9)   | 145 (26.6)   | 132 (26.2)   |                               |
| Yes                              | 222 (77.4)   | 381 (74.1)   | 400 (73.4)   | 371 (73.8)   |                               |
| <b>Did MUN Residency</b>         |              |              |              |              | <0.000 <sup>c,e,f</sup>       |
| No                               | 108 (37.6)   | 191 (37.2)   | 216 (40.3)   | 280 (55.3)   |                               |
| Yes                              | 179 (62.4)   | 322 (62.8)   | 320 (59.7)   | 226 (44.7)   |                               |
| <b>Specialty</b>                 |              |              |              |              | <0.000 <sup>c,e,f</sup>       |
| Specialist                       | 142 (48.8)   | 284 (55.3)   | 294 (53.9)   | 337 (65.7)   |                               |
| GP/FP                            | 149 (51.2)   | 230 (44.7)   | 251 (46.1)   | 176 (34.3)   |                               |
| <b>Age at Graduation</b>         |              |              |              |              | 0.364                         |
| Young (< 30)                     | 249 (85.9)   | 442 (86.0)   | 452 (83.2)   | 418 (82.6)   |                               |
| Old (≥ 30)                       | 41 (14.1)    | 72 (14.0)    | 91 (16.8)    | 88 (17.4)    |                               |
| <b>Workplace in Canada</b>       |              |              |              |              | 0.006 <sup>b,c</sup>          |
| No                               | 50 (17.2)    | 64 (12.5)    | 49 (9.0)     | 59 (11.5)    |                               |
| Yes                              | 241 (82.8)   | 450 (87.5)   | 497 (91.0)   | 454 (88.5)   |                               |
| <b>Workplace in NL</b>           |              |              |              |              | <0.000 <sup>c,e,f</sup>       |
| No                               | 196 (67.4)   | 361 (70.2)   | 371 (67.9)   | 298 (58.1)   |                               |
| Yes                              | 95 (32.6)    | 153 (29.8)   | 175 (32.1)   | 215 (41.9)   |                               |
| <b>Workplace in Rural Canada</b> |              |              |              |              | 0.021 <sup>c,f</sup>          |
| No                               | 253 (86.9)   | 458 (89.1)   | 467 (85.5)   | 469 (91.4)   |                               |
| Yes                              | 38 (13.1)    | 56 (10.9)    | 79 (14.5)    | 44 (8.6)     |                               |
| <b>Workplace in Rural NL</b>     |              |              |              |              | 0.079                         |
| No                               | 271 (93.1)   | 496 (96.5)   | 513 (94.0)   | 492 (95.9)   |                               |
| Yes                              | 20 (6.9)     | 18 (3.5)     | 33 (6.0)     | 21 (4.1)     |                               |

MUN= Memorial University of Newfoundland; NL= Newfoundland and Labrador; post hoc tests: a= 70s significantly differ from 80s, b= 70s significantly differ from 90s, c= 70s significantly differ from 00s, d= 80s significantly differ from 90s, e= 80s significantly differ from 00s, f= 90s significantly differ from 00s



Table 6: Work location of MUN medical graduates in their first 10 years of practice

|                              | 2004 for 90s graduates<br>% of graduates | 2014 for 00s graduates<br>% of graduates |
|------------------------------|------------------------------------------|------------------------------------------|
| In Canada                    | 90.3                                     | 88.1                                     |
| In NL                        | 31.2                                     | 41.9                                     |
| In rural Canada              | 15.4                                     | 8.6                                      |
| In rural NL                  | 7.6                                      | 4.1                                      |
| NL=Newfoundland and Labrador |                                          |                                          |

Confidential
